# Supplementary material
Source: PubMed Central journal article supplement (PMC6249597)

**Supplemental Figure S1.** Clinical chemistry results for NHPs in each group post challenge (days 0-28 post challenge correspond to study days 70-98). Groups correspond to those listed in main Table 1.

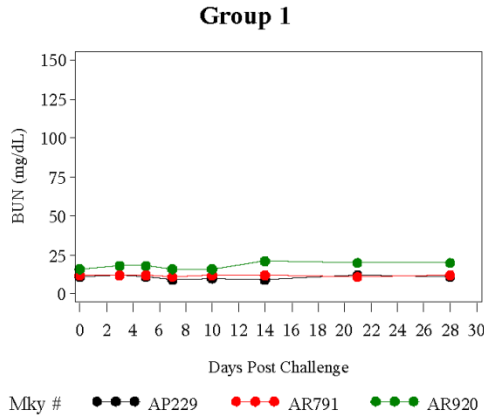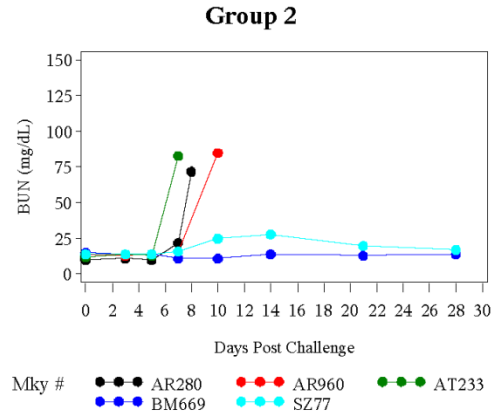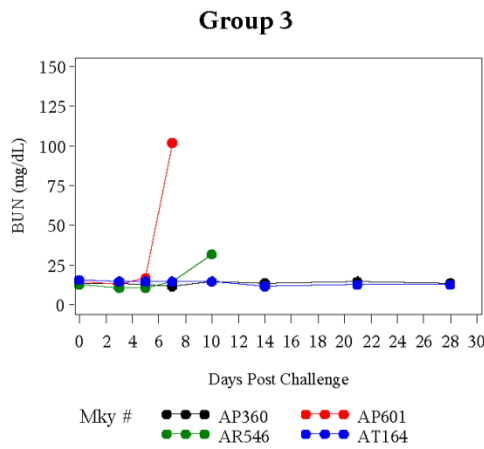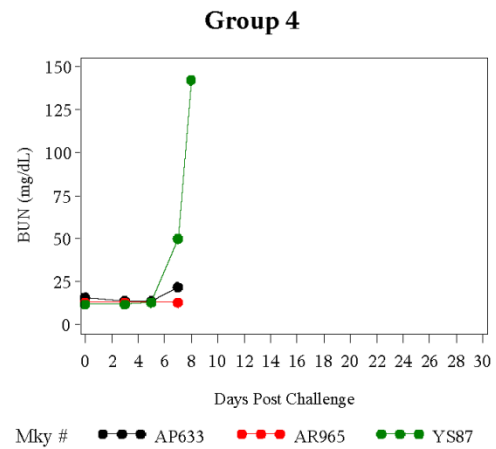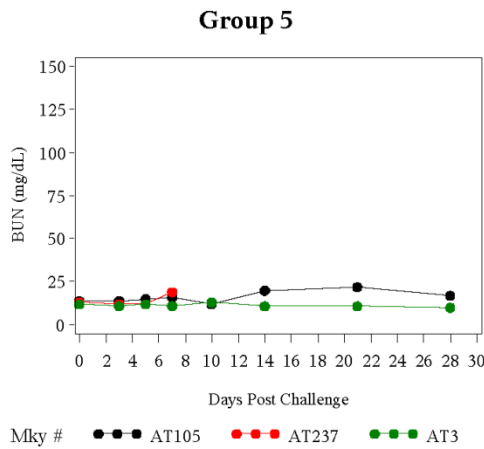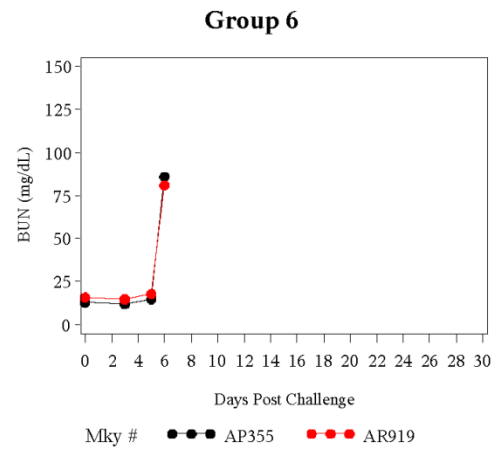

Figure S1. Continued.

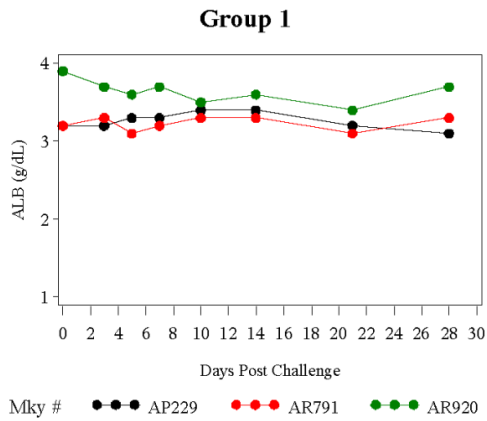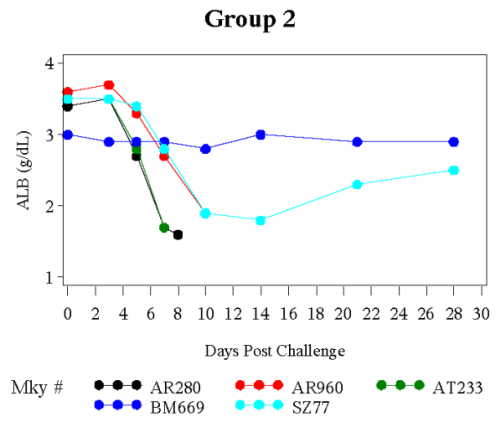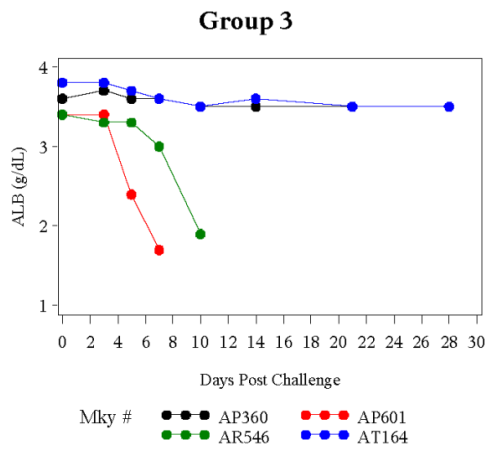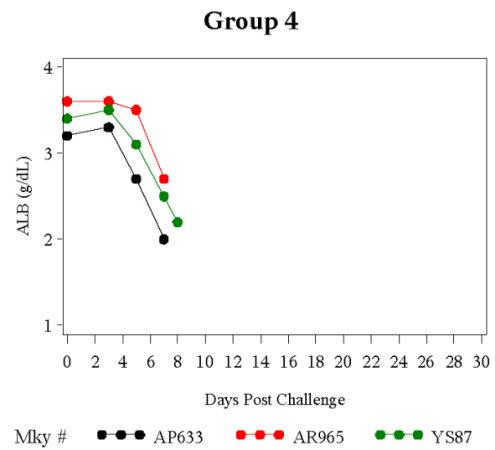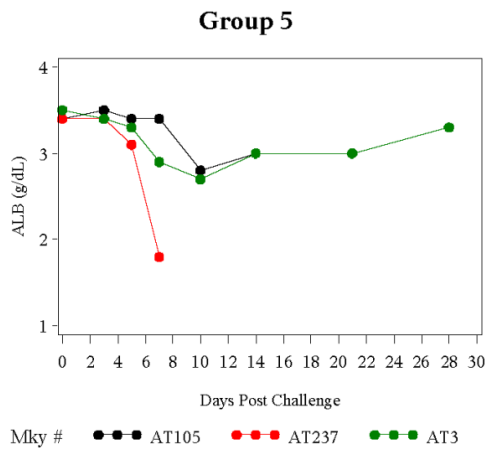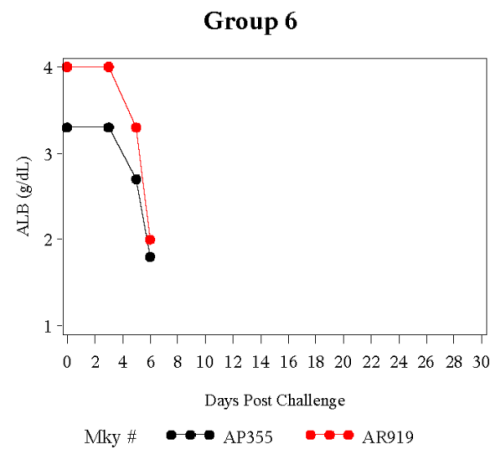

Figure S1. Continued.

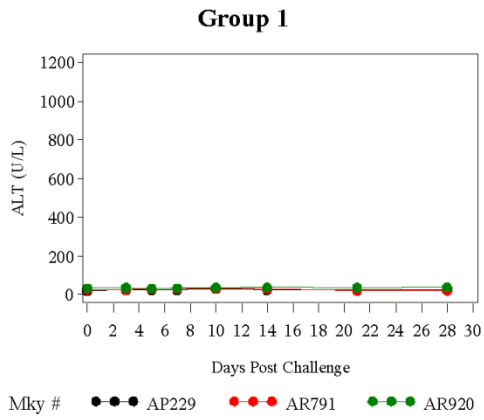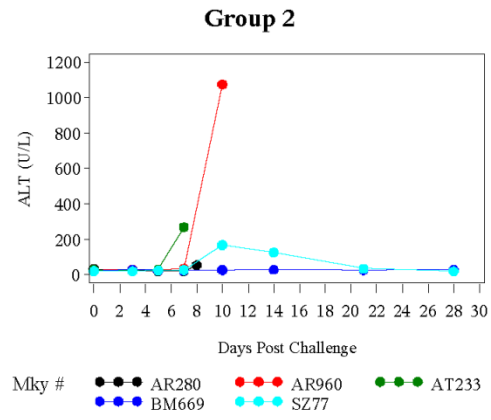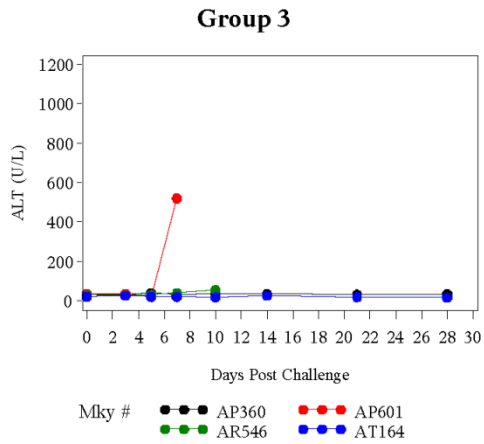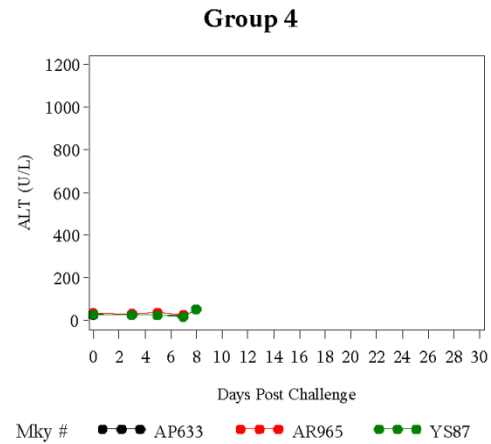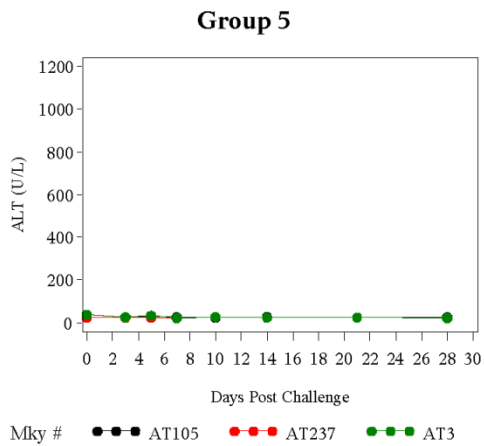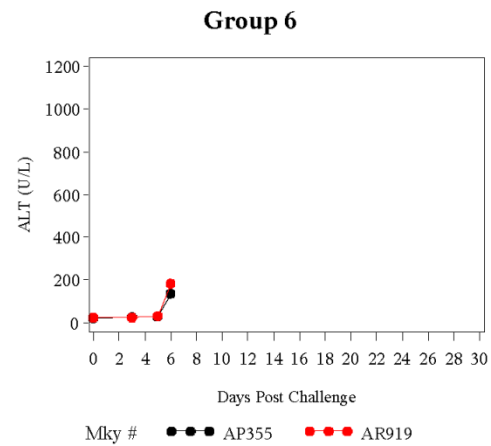

Figure S1. Continued.

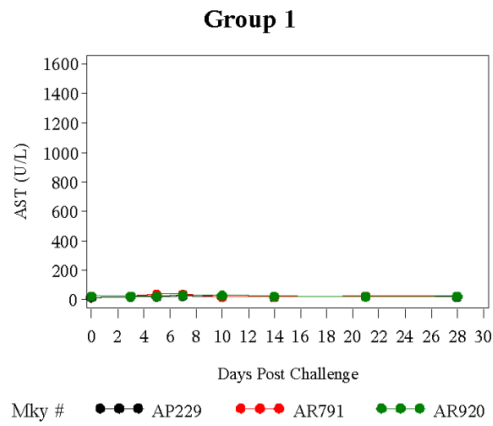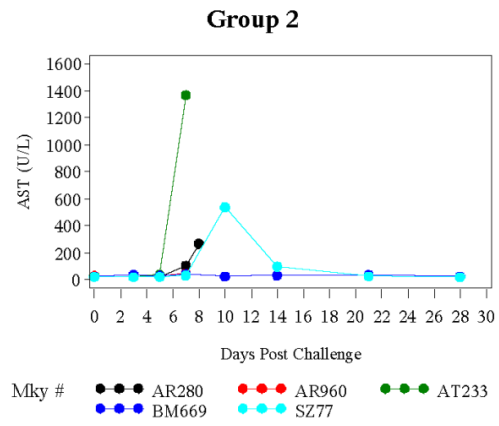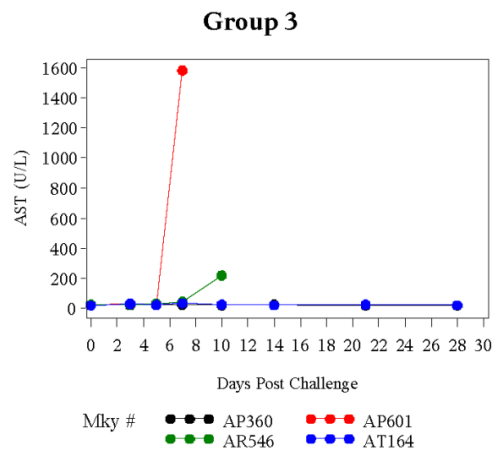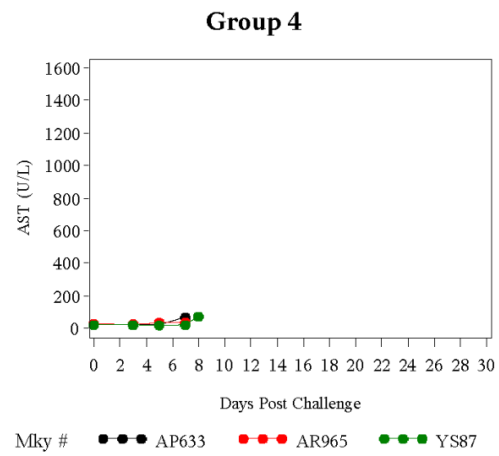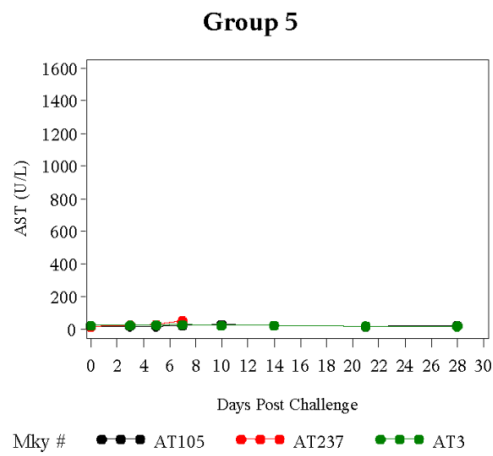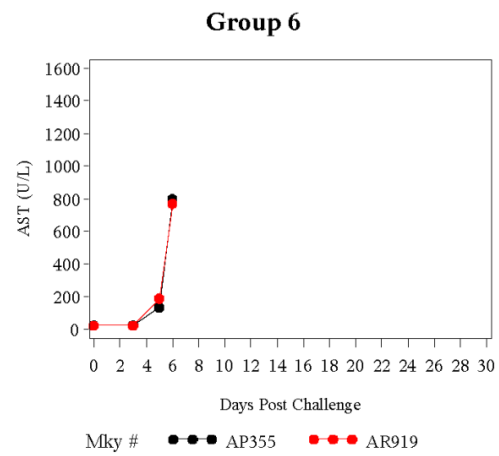

Figure S1. Continued.

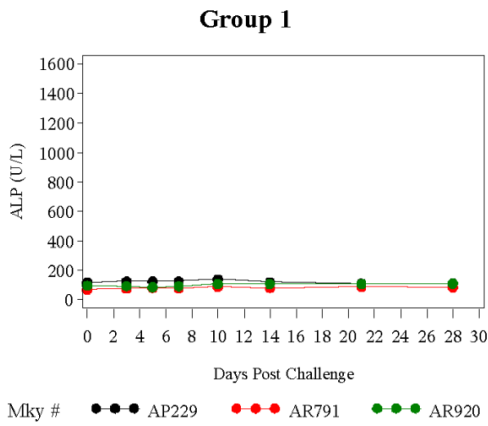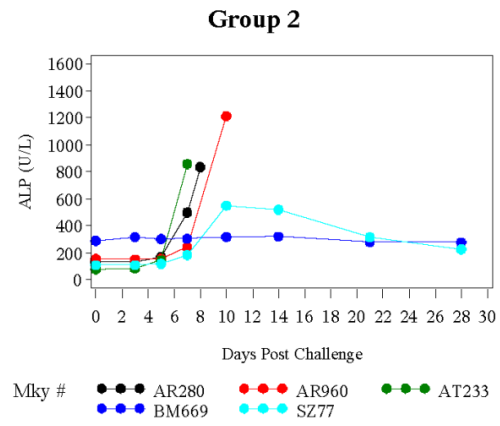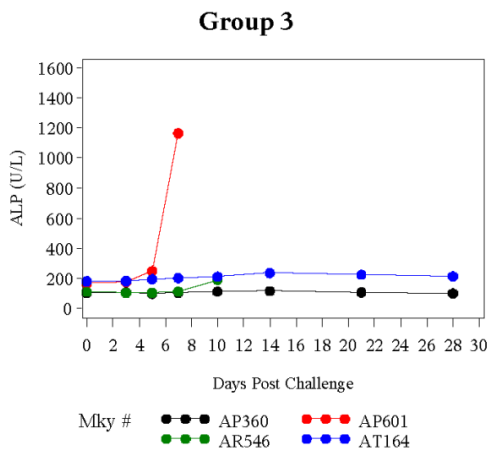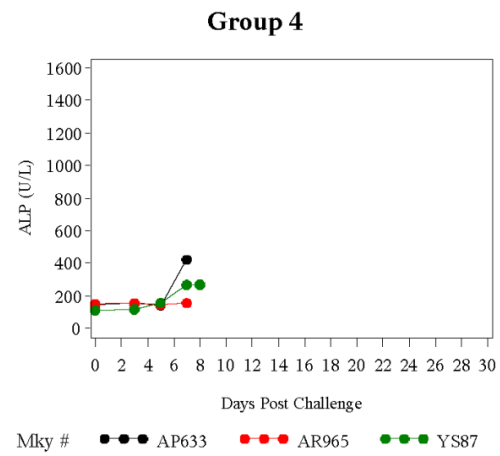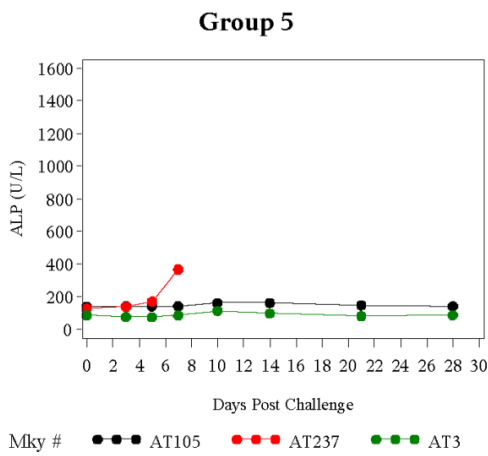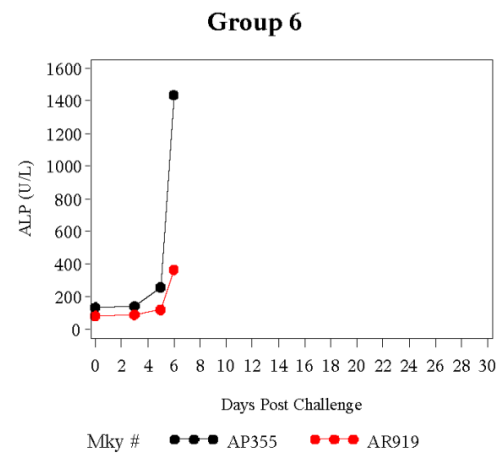

Figure S1. Continued.

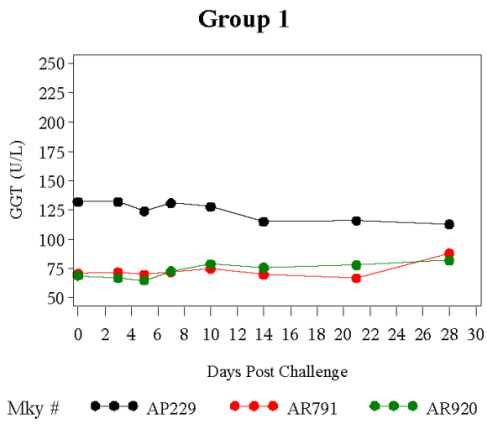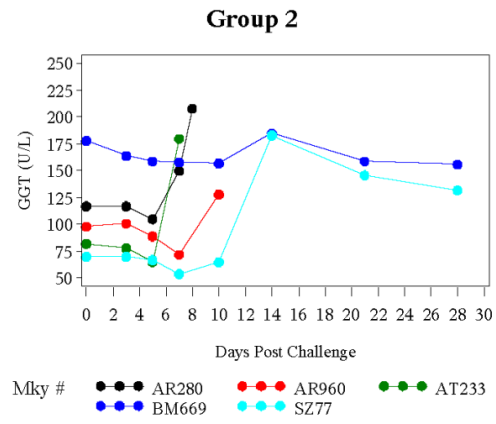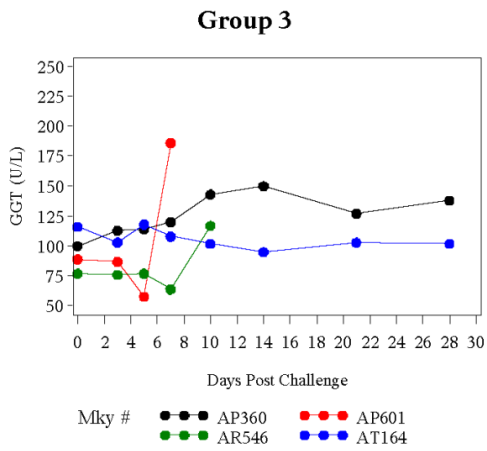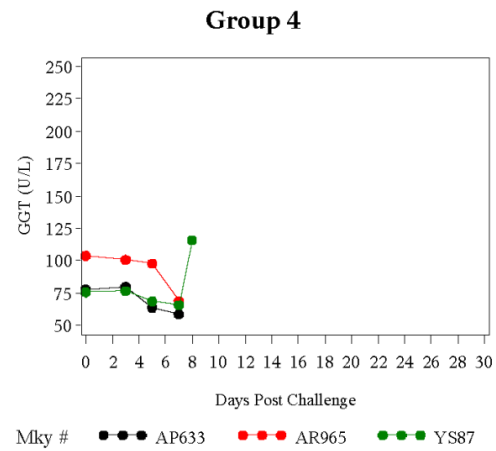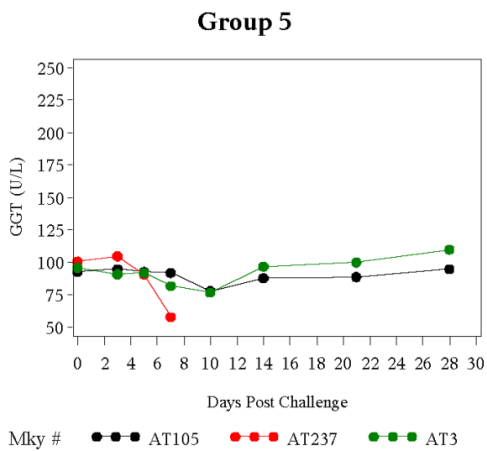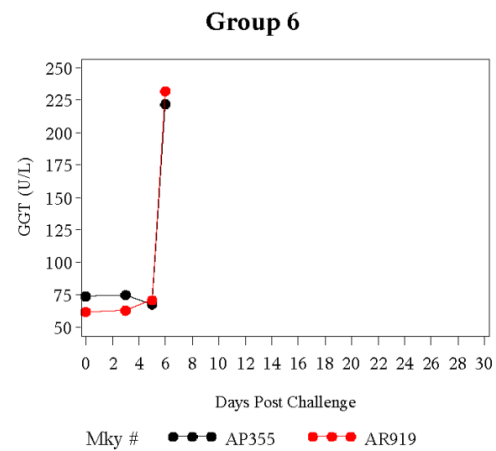

Figure S1. Continued.

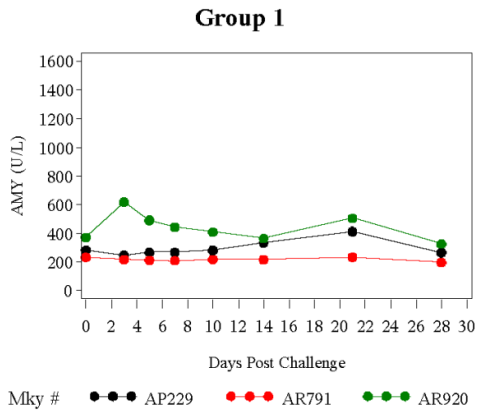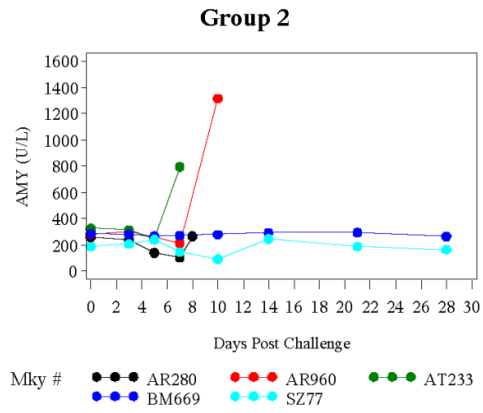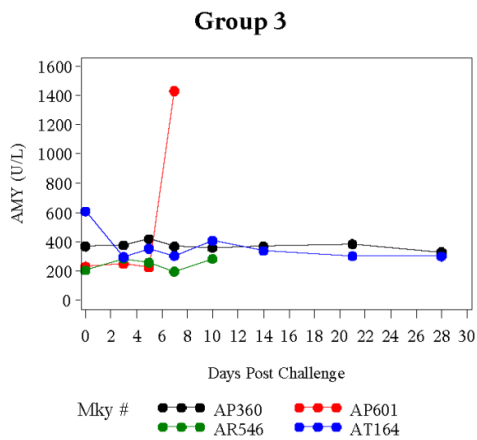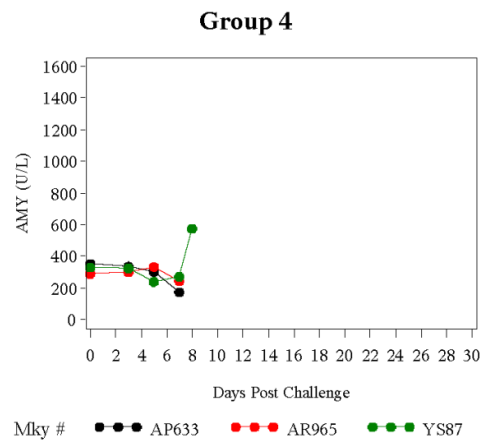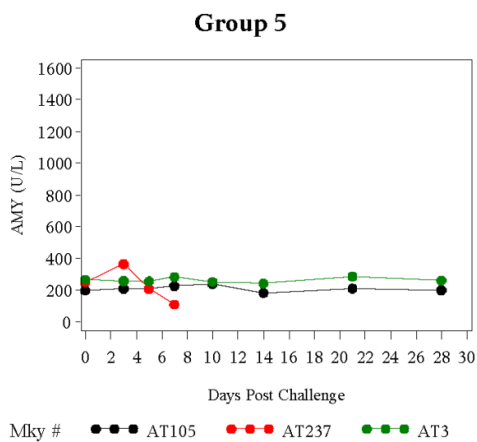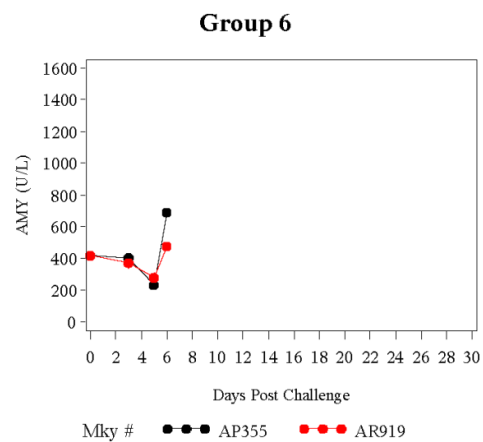

Figure S1. Continued.

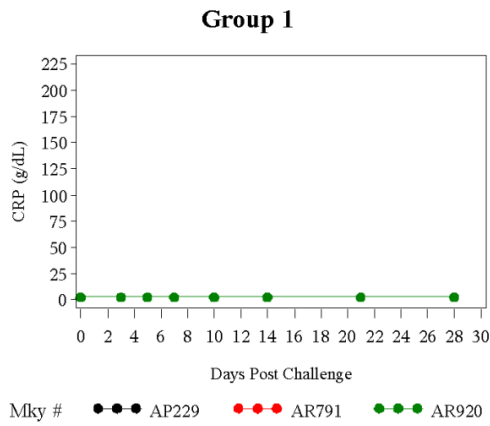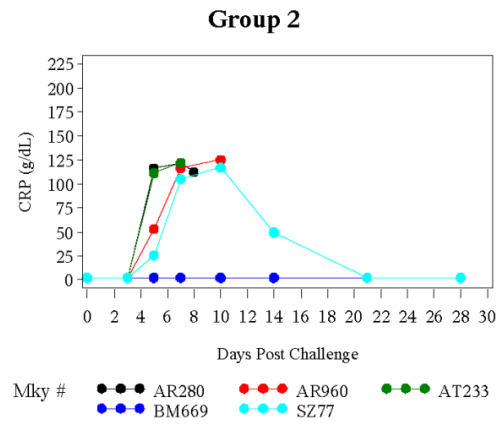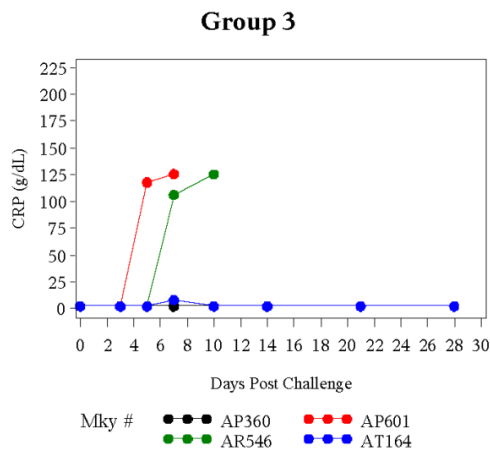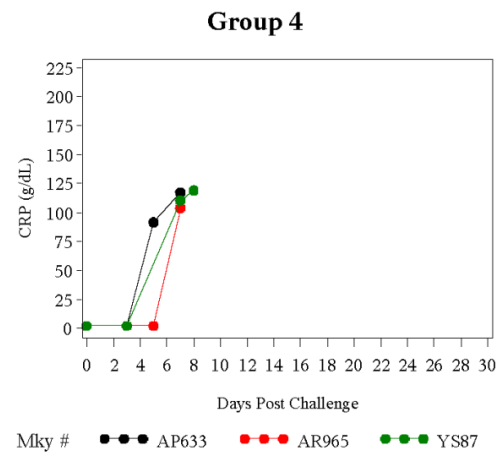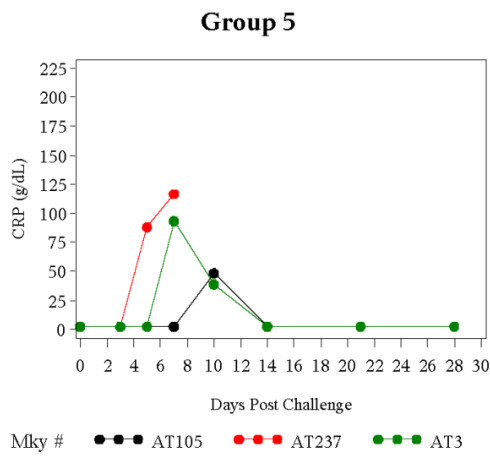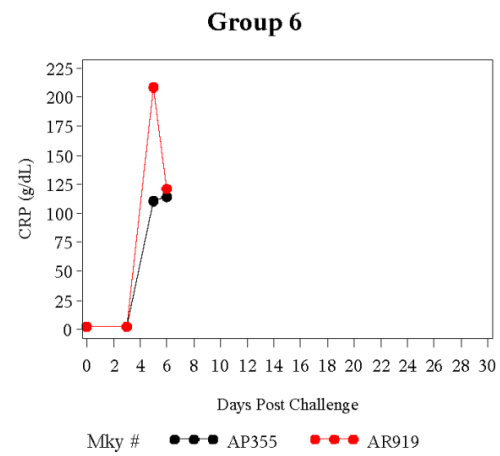

Supplement: jiy316_suppl_supplemental_figure-s1.pdf [file jiy316_suppl_supplemental_figure-s1.pdf]
